# Supplementary material for: Randomised, double-blind, multicentre, phase Ⅰ/Ⅱ dose escalation and expansion trial of GR1501 in patients with plaque psoriasis: study protocol
Source: HighWire-hosted journal article supplement (doi:10.1136/bmjopen-2020-039067), 2020-11-01
Supplement: bmjopen-2020-039067supp001_data_supplement.pdf [file bmjopen-2020-039067supp001_data_supplement.pdf]

**Supplementary appendix 1. Selection criteria to participate in the study**

| Inclusion criteria | Those who meet all of the following conditions can be included.                                                                                                                                                                                                                                                                                                                                                                                                                                                                                                                                                                                                                                                                                                                                                                                                                                                                                                                                                                                                                                                                                                                                                                                                                                                                                                                                                                                                                                                                                                                                                                                                                                                                                                                                                                                                                                                                                                                                                                                                                                                                                                                                                                                                                                                                                                                                                                                                                                                                                                                                                                                                                                                                                                                                                                                                                                                                                        |
|--------------------|--------------------------------------------------------------------------------------------------------------------------------------------------------------------------------------------------------------------------------------------------------------------------------------------------------------------------------------------------------------------------------------------------------------------------------------------------------------------------------------------------------------------------------------------------------------------------------------------------------------------------------------------------------------------------------------------------------------------------------------------------------------------------------------------------------------------------------------------------------------------------------------------------------------------------------------------------------------------------------------------------------------------------------------------------------------------------------------------------------------------------------------------------------------------------------------------------------------------------------------------------------------------------------------------------------------------------------------------------------------------------------------------------------------------------------------------------------------------------------------------------------------------------------------------------------------------------------------------------------------------------------------------------------------------------------------------------------------------------------------------------------------------------------------------------------------------------------------------------------------------------------------------------------------------------------------------------------------------------------------------------------------------------------------------------------------------------------------------------------------------------------------------------------------------------------------------------------------------------------------------------------------------------------------------------------------------------------------------------------------------------------------------------------------------------------------------------------------------------------------------------------------------------------------------------------------------------------------------------------------------------------------------------------------------------------------------------------------------------------------------------------------------------------------------------------------------------------------------------------------------------------------------------------------------------------------------------------|
|                    | <ol style="list-style-type: none"> <li>1. Male or female patients aged 18-65 years.</li> <li>2. Body mass index (BMI) 18-32 kg/m<sup>2</sup> (not applicable in the case extension stage).</li> <li>3. Diagnosed with chronic stable plaque psoriasis, baseline visit to psoriasis <math>\geq</math> 6 months.</li> <li>4. Psoriasis body surface area (BSA) <math>\geq</math>10% at screening and baseline.</li> <li>5. Psoriasis static physician overall assessment (sPGA) score <math>\geq</math> 3 and psoriasis area and severity index (PASI) score <math>\geq</math> 12 at screening and baseline.</li> <li>6. Moderate or severe plaque psoriasis patients who have been treated regularly but have poor results.</li> <li>7. Patients who signed the informed consent.</li> </ol>                                                                                                                                                                                                                                                                                                                                                                                                                                                                                                                                                                                                                                                                                                                                                                                                                                                                                                                                                                                                                                                                                                                                                                                                                                                                                                                                                                                                                                                                                                                                                                                                                                                                                                                                                                                                                                                                                                                                                                                                                                                                                                                                                            |
| Exclusion criteria | Those who meet one of the following conditions will be excluded.                                                                                                                                                                                                                                                                                                                                                                                                                                                                                                                                                                                                                                                                                                                                                                                                                                                                                                                                                                                                                                                                                                                                                                                                                                                                                                                                                                                                                                                                                                                                                                                                                                                                                                                                                                                                                                                                                                                                                                                                                                                                                                                                                                                                                                                                                                                                                                                                                                                                                                                                                                                                                                                                                                                                                                                                                                                                                       |
|                    | <ol style="list-style-type: none"> <li>1. Pustular psoriasis, erythrodermic psoriasis and/or drip psoriasis at screening or baseline.</li> <li>2. Drug-induced psoriasis at baseline.</li> <li>3. Patients received the following treatments before baseline: a. Systemic treatment of psoriasis within 4 weeks prior to baseline; b. Local antipsoriatic medication within 2 weeks prior to baseline; c Any traditional Chinese medicine or Chinese patent medicine for psoriasis within 2 weeks before the baseline; d. Physical therapy treatment (including photochemotherapy, ultraviolet therapy, self-treatment with sunbed, etc.) within 4 weeks before the baseline.</li> <li>4. The following biologics have recently been used: etanercept &lt;28 days before baseline; infliximab, adalimumab or alefacept &lt;60 days; golimumab &lt;90 days; ustekinumab &lt;8 months; rituximab; or all other biological agents &lt;5 half-lives</li> <li>5. Patients have received any biological agents that directly target IL-17 or IL-17 receptors.</li> <li>6. Patients who have participated in other drug clinical trials within 3 months before the baseline, or those who have been tested within 5 half-lives before the baseline (the test drug has a long half-life and 5 half-lives of more than 3 months)</li> <li>7. Vaccination with live vaccine within 4 weeks prior to baseline, or intention to inoculate a live vaccine during the study period.</li> <li>8. Patients with active tuberculosis, or those with active or latent tuberculosis at the screening.</li> <li>9. Patients who have a history of allergies to drugs or biological products, or those who are judged by the investigator to be allergic to any ingredient of the study drug.</li> <li>10. Patients underwent major surgery within 8 weeks prior to the baseline or will be required to undergo such surgery during the study. Based on the investigator's opinion and consulting with the sponsor or its designee, these procedures may cause unacceptable risks to the patient.</li> <li>11. History of the lymphoproliferative disease; or current history of malignancy or a history of malignancy (except for squamous cell carcinoma of the skin, basal cell carcinoma, and cervical cancer in situ after thorough treatment without any signs of recurrence).</li> <li>12. Associated with an active infection, or infection history: a. Systemic anti-infective treatment 4 weeks before baseline; b. Serious infection with hospitalization or intravenous anti-infective treatment within 8 weeks before baseline; c. Recurrent, chronic or other active infections, which are assessed by the investigator to increase the risk of the subject.</li> <li>13. Hepatitis B surface antigen positive, hepatitis C antibody positive, human immunodeficiency virus (HIV) antibody positive, TPPA positive (except for the addition of RPR</li> </ol> |

negative).

14. ECG abnormalities that are clinically significant and can cause unacceptable risks to patients if they participate in the study.

15. Unstable cardiovascular disease, defined as clinical deterioration in the past 3 months (such as unstable angina, rapid atrial fibrillation) or hospitalization for heart disease in the past 3 months.

16. Hypertensive patients whose blood pressure cannot be stabilized after using hypertensive drugs.

17. Significant abnormalities in liver and kidney function and blood routine, including: alanine aminotransferase (ALT) and/or aspartate aminotransferase (AST) exceeding 2 times the upper limit of normal; serum creatinine greater than the upper limit of normal; hemoglobin <90 g/L White blood cell count <3.5×10<sup>9</sup>/L, platelet count (PLT)<100×10<sup>9</sup>/L; neutrophil count <1.5×10<sup>9</sup>/L; Other abnormal laboratory tests may affect the test or interfere with the test results assessed by the investigator.

18. Blood donation ≥ 400 mL within 4 weeks before baseline, or severe blood loss at least 400 mL within 4 weeks before baseline, or blood transfusion within 8 weeks, or blood donors scheduled for the study period.

19. Women of child-bearing potential are unwilling or not taking effective contraceptive measures from the screening period to at least 5 months after the end of the last dose.

20. Pregnant or nursing (lactating) women.

21. Patients who have a history of smoking, alcohol abuse or drug abuse.

22. Patients with a history of serious mental illness or family history.

23. Other reasons the investigator considered it inappropriate to participate in the study.

**Supplementary appendix 2. Grade definition refers to the severity of the CTCAE Version 4.0.**

| Grade   | Definition                                                                                                                                                               |
|---------|--------------------------------------------------------------------------------------------------------------------------------------------------------------------------|
| Grade 1 | Mild; asymptomatic or mild symptoms; clinical or diagnostic observations only; intervention not indicated.                                                               |
| Grade 2 | Moderate; minimal, local or noninvasive intervention indicated; limiting age-appropriate instrumental ADL*.                                                              |
| Grade 3 | Severe or medically significant but not immediately life-threatening; hospitalization or prolongation of hospitalization indicated; disabling; limiting self-care ADL**. |
| Grade 4 | Life-threatening consequences; urgent intervention indicated.                                                                                                            |
| Grade 5 | Death related to AE.                                                                                                                                                     |

CTCAE, common terminology criteria for adverse events; AE, adverse events; ADL, activities of daily living.

\*Instrumental ADL refer to preparing meals, shopping for groceries or clothes, using the telephone, managing money, etc.

\*\*Self-care ADL refer to bathing, dressing and undressing, feeding self, using the toilet, taking medications, and not bedridden.

**Supplementary appendix 3. The similarity and differences of GR1501 to any approved IL-17 inhibitors**

| Biological agents      | Structure                                     | Mechanism of action | Molecular weight                                                            | Affinity $K_D$ |                                       |
|------------------------|-----------------------------------------------|---------------------|-----------------------------------------------------------------------------|----------------|---------------------------------------|
| Secukinumab (AIN457)   | Fully human IgG1 $\kappa$ monoclonal antibody | anti-IL-17A         | Selectively binds and neutralizes IL-17A                                    | 151kDa         | $1.75 \times 10^{-10}$ M (for IL-17A) |
| Ixekizumab (LY2439821) | Humanized IgG4 monoclonal antibody            | anti-IL-17A         | Selectively binds and neutralizes IL-17A                                    | 146kDa         | <2 pM (for IL-17A)                    |
| Brodalumab (AMG 827)   | Fully human IgG2 monoclonal antibody          | anti-IL-17RA        | selectively targets human IL-17 receptor and antagonizes the IL-17 pathway. | 144kDa         | 239 pM (for human IL-17RA)            |
| GR1501                 | Fully human IgG4 monoclonal antibody          | anti-IL-17A         | Selectively binds and neutralizes IL-17A                                    | 150kDa         | $1.39 \times 10^{-10}$ M (for IL-17A) |

**Supplementary appendix 4. Comparison of protocol for biological agents targeting IL-17 in the treatment of psoriasis**

| Biological agents               | Secukinumab (AIN457)                            |                                                                         | Ixekizumab (LY2439821)                                                  | Brodalumab (AMG 827)                              |                                                       | GR1501                                                |
|---------------------------------|-------------------------------------------------|-------------------------------------------------------------------------|-------------------------------------------------------------------------|---------------------------------------------------|-------------------------------------------------------|-------------------------------------------------------|
| Phase                           | Phase I                                         | Phase II                                                                | Phase II                                                                | Phase I                                           | Phase II                                              | Phase I/II                                            |
| Sample size of participants     | 16                                              |                                                                         | 142                                                                     | 84                                                | 198                                                   | 226                                                   |
| Allocation                      | Non-Randomized                                  | Randomized                                                              | Randomized                                                              | Randomized                                        | Randomized                                            | Randomized                                            |
| Masking                         | Open-label                                      | Quadruple (Participant, Care Provider, Investigator, Outcomes Assessor) | Quadruple (Participant, Care Provider, Investigator, Outcomes Assessor) | Triple (Participant, Care Provider, Investigator) | Triple (Participant, Investigator, Outcomes Assessor) | Double (Participant, Investigator)                    |
| Ages Eligible for Study:        | 18-65 Years                                     | 18 Years and older                                                      | 18 Years and older                                                      | 18-55 Years                                       | 18-70 Years                                           | 18-65 Years                                           |
| Sexes Eligible for Study:       | All                                             | All                                                                     | All                                                                     | All                                               | All                                                   | All                                                   |
| Accepts Healthy Volunteers:     | Yes (healthy volunteers and psoriasis patients) | No                                                                      | No                                                                      | Yes (healthy volunteers and psoriasis patients)   | No                                                    | No                                                    |
| Safety and tolerability measure | Yes                                             | Yes                                                                     | Yes                                                                     | Yes                                               | Yes                                                   | Yes                                                   |
| Pharmacokinetics measure        | No                                              | No                                                                      | Yes                                                                     | Yes                                               | Yes                                                   | Yes                                                   |
| Immunogenicity measure          | No                                              | Yes                                                                     | Yes                                                                     | Yes                                               | Yes                                                   | Yes                                                   |
| Efficacy measure                | No                                              | Yes                                                                     | Yes                                                                     | Yes                                               | Yes                                                   | Yes                                                   |
| Treatment period                | 8-day                                           | 12-week                                                                 | 16-week                                                                 | NA                                                | 12-week                                               | Dose escalation: 12-week<br>Expansion cohort: 52-week |
| Follow-up period                | 3-week                                          | 24-week                                                                 | 4-week                                                                  | NA                                                | 4-week                                                | Dose escalation: 10-week<br>Expansion cohort: 4-week  |

**Supplementary appendix 5. Patient consent forms****GR1501 注射液在斑块状银屑病患者中单次给药和多次重复  
给药的耐受性、药代动力学、免疫原性、剂量递增的安全性、  
初步疗效评价临床研究****知情同意书**

研究方案编号 : GR1501-001

受试者筛选号 : □□□

受试者姓名缩写 : □□□□

研究负责人 :

研 究 单 位 :

申 办 单 位 : 重庆智翔金泰生物制药有限公司  
智翔（上海）医药科技有限公司

GR1501 注射液治疗斑块状银屑病临床试验知情同意书

## 知情同意书·知情告知页

尊敬的受试者：

我们真诚邀请您参加本研究。在您决定是否参加这项研究之前，请您尽可能的仔细阅读以下内容，可以帮助您了解该项研究，以及研究的具体内容、研究的流程和期限、参加研究后可能给您带来的益处、风险和不适。您是否参与本研究完全取决于您的意愿，无任何强迫。如果您拒绝参与本临床研究，您仍将继续接受治疗，并且不会影响您参与其他临床研究，您也可以选择其他治疗方案。当您有任何疑问时可以随时咨询我们，我们将给您详尽的解答。如果您愿意，也可以和您的亲属、朋友一起讨论，或者请研究医生给予解释。

本研究并已于 2018 年 04 月 11 日通过国家药品监督管理局批准（批件号：2018L02322）。

### 【研究背景】

GR1501 注射液由智翔（上海）医药科技有限公司、重庆智翔金泰生物制药有限公司研制开发，其临床前研究表明在多种动物疾病模型中本品具有显著抑制模型动物的炎症严重程度作用，临床前药理、毒理学试验及国外同类型品种临床试验均揭示其安全性、耐受性良好。

### 【研究目的】

主要目的为评估斑块状银屑病患者单次和多次皮下注射给药后“GR1501 注射液”的安全性、耐受性。次要目的包括考察单次、多次皮下注射给药后“GR1501 注射液”在人体内的药代动力学参数，免疫原性和初步疗效。

### 【研究设计、研究内容、方法及程序简介】

本研究将严格遵守《药物临床试验质量管理规范》和《赫尔辛基宣言》。采用随机、双盲、安慰剂平行对照研究，在观察安全性、耐受性和初步疗效的同时，采集生物标本进行药代动力学及相关研究。本研究在北京大学人民医院、中国人民解放军总医院、浙江大学附属第一医院、中南大学湘雅二医院等中心开展。

本临床试验分先后两个阶段进行：剂量递增研究阶段（包括单次给药期、多次给药期、追踪随访期）和病例扩展研究阶段（多次给药期、长期给药期、追踪随访期）。

### 【参加研究的可能受益】

研究药物 GR1501 属于单克隆抗体药，如果您同意参加本研究，您的病情将有可能获得控制或缓解，但也可能不能控制或缓解。您参与并配合本研究，从中得到的信息在将来能够对和您病情相同的病人有指导意义。在此，为您对新药研发做出的贡献致以感谢。

### 【参加研究的可能风险】

**GR1501 注射液治疗斑块状银屑病临床试验知情同意书**

GR1501 注射液的非临床安全性评价研究（包括组织交叉反应试验、小鼠安全药理试验、食蟹猴安全药理试验、食蟹猴急性毒性试验、食蟹猴长期毒性试验、免疫毒性试验、局部刺激性试验、体外溶血试验、过敏性试验等）结果显示本研究药品在动物试验中具有较好的安全性和耐受性。

**【参加研究的不确定风险】**

国外已上市的抗 IL-17 受体单抗 Siliq（Brodalumab）说明书中提示要特别关注自杀倾向和行为，但是与 GR1501 注射液相同靶点的已上市抗 IL-17A 单抗 Secukinumab 单抗和 Ixekizumab 单抗均未提示关于自杀倾向和行为的危险。为了更好地控制受试者和试验的风险，在本临床研究“病例扩展研究阶段”中增加了哥伦比亚-自杀严重程度评定量表。

**【有关内容的咨询】**

您有权就有关研究内容进行咨询，咨询电话（研究者电话）：\_\_\_\_\_；且您有权就有关您的权利或相关风险等问题进行咨询，咨询电话（伦理委员会电话）：\_\_\_\_\_。

**【退出研究】：**

退出研究的权利：您参加此项研究是完全自愿的。如因任何原因，您不愿意参加或不愿继续参加此研究，并不会对您的权益有任何影响。此外，您有权在任何时间退出此研究，如果您不参加本项研究，或中途退出研究，还有很多可供您选择的其它替代的治疗药物和方法。如果您选择参加本项研究，我们希望您能够坚持完成全部研究过程。退出前所有从您那里收集的信息和研究样本，研究中心仍可利用，以便深入了解研究药物。如果您想退出本研究，请通知负责本研究的医师。他/她将安排您停止全部或部分的研究活动，并为您提供其他的护理。

**【有关研究费用】**

研究过程中，申办方免费提供试验期间内的试验药物以及研究相关的检查，比如血常规、血生化、心电图等检查。

**【参加研究的补助】**

合格入选并参与研究的受试者将得到适当的补助，补助的具体标准如下：①\_\_\_\_\_；本研究阶段将进行 PK/ADA 采血：每个剂量组按方案规定完成全部给药计划的受试者需要采血 20 次。②\_\_\_\_\_。本研究受试者完成全部随访，共约 21 次访视。补助将根据您的实际采血次数和来医院的访视次数，按银行卡转账和/或本人签收的形式分次进行。

因此，参加本阶段研究的受试者如果您按试验方案要求完成整个试验，\_\_\_\_\_



#### GR1501 注射液治疗斑块状银屑病临床试验知情同意书

本研究的医护人员会以科学原则并尽最大责任把可能对您造成的伤害降到最低。您在整个研究期间采集的总血量低于国家规定的献血时通常能够耐受的采血量。可能会采集额外的血液样品用于安全性评价。

#### **【损伤补偿】**

申办者除了对入组参加临床试验的您提供保险，并对于发生与试验相关的损害或死亡，承担治疗的费用及相应的经济补偿。

#### **【可选的其他医疗方案】**

您并非必须参与本研究才能获得针对您病情的治疗。如果您不参加本研究，您的研究医生可能根据您的病情安排其他替代治疗（如其他生物制剂、光疗等）。您可以与您的研究医生讨论这些替代治疗方案的风险与优点。

#### **【保密制度】**

您参加本临床研究以及在临床研究中的个人信息是严格保密的，您的医疗记录（包括原始病历、化验单等）将完整地保存在您所就诊的医院。您的病例报告表（CRF）等数据信息将以研究编号数字和您姓名拼音缩写而非您的姓名汉字加以标识，由研究者收集后提交申办方。可以识别您身份的信息将不会透露给研究小组以外的成员，除非获得您的许可。为确保研究过程符合法律、法规要求以及按照规定进行，研究者、申办方代表、伦理委员会成员、药品监督管理部门相关人员以及发生保险索赔时保险公司代表将被允许查阅您的医疗记录。关于本项研究的任何公开报告将不会披露您个人的任何身份信息。我们将在法律允许的范围内，尽一切努力保护您个人医疗资料的隐私。

#### **【怎样获得更多的信息】**

研究期间，您可以在任何时间提出有关本项研究的任何问题。您的医生将给您留下他/她的电话号码以便能回答您的问题。

如果在研究过程中有任何重要的信息更新，可能会影响到您继续参加研究的意愿时，您的医生将及时通知您。

感谢您阅读以上信息。如果您决定参加本项研究，请告诉您的医生，他/她将会为您安排一切有关研究的事务。

如果在试验过程中出现预期以外的临床影响，我们将会对知情同意书的相关内容进行修改，并经受试者或其法定代理人重新签名确认。请您保留这份资料。

GR1501 注射液治疗斑块状银屑病临床试验知情同意书

## 知情同意书·同意签字页

本知情同意书一式两份，受试者和研究者各一份，双方签字后有效。

### 【受试者声明】

我已经阅读了上述有关本研究的介绍，而且有机会就此研究与医生讨论并提出问题，我提出的问题都得到了满意的答复。

我知道参加本研究可能产生的风险和获益。我明白：

我可以随时向医生咨询更多的信息。

我可以随时退出本研究，而不会受到歧视或报复，医疗待遇和其它权益不会受到影响。

我同样清楚，如果我中途退出研究，特别是药物的原因使我退出研究时，我若将病情变化告诉医生，完成相应的检查，这将对我本人和整个研究十分有利。

如果因病情变化我需要采取任何其它的药物，我会事先征求医生的意见，或在事后如实告诉医生。

我同意药品监督管理部门、伦理委员会、监查员和稽查员查阅我的研究资料。

最后，我自愿参加本项研究，愿意与研究人员合作，本研究期间不参加其他临床研究。

受试者签名：\_\_\_\_\_ 身份证号码：\_\_\_\_\_

联系电话：\_\_\_\_\_ 日期：\_\_\_\_年\_\_\_\_月\_\_\_\_日

受试者法定代理人签名（必要时）：\_\_\_\_\_

联系电话：\_\_\_\_\_ 日期：\_\_\_\_年\_\_\_\_月\_\_\_\_日

独立第三方签名（必要时）：\_\_\_\_\_

联系电话：\_\_\_\_\_ 日期：\_\_\_\_年\_\_\_\_月\_\_\_\_日

### 【研究者声明】

我确认已向受试者解释了本试验的详细情况，包括其权利以及可能的受益和风险，并认真回答了受试者的所有有关问题；并将签署完成的知情同意书副本交给受试者保留。

研究者签名：\_\_\_\_\_

联系电话：\_\_\_\_\_ \_\_\_\_\_年\_\_\_\_月\_\_\_\_
